# Supplementary material for: The Anatomy of Entrepreneurial Failure: Antecedents of the Performance Failure Appraisal Inventory and the Role of Social Support
Source: MDPI journal article supplement (doi:10.3390/su15097505), 2023-05-04
Supplement: s1 [file s1]

## Supplementary Materials

Dear Participant!

We are faculty members at the University of Technology and Applied Sciences. We request you to please spare few minutes to fill this questionnaire for an important research study. The aim of this study is to investigate the causes of entrepreneurship failure and the role of fear of failure and social support. This questionnaire will require only 10 to 15 min to complete. We will be highly thankful for your cooperation in completing this research study. The data collected through this questionnaire will be used solely for the research. Under no circumstances will the individual data be shared with anyone. You can complete this survey without giving any identification or personal data. Your valuable contribution will be highly appreciated.

Sincerely yours,  
Research Team

\*\*\*

1—Your age

|                |  |
|----------------|--|
| 15–20 years    |  |
| 20 to 30 years |  |
| 30 to 40 year  |  |
| 40 to 50 year  |  |
| 50 and Above   |  |

2— Your education

|                  |  |
|------------------|--|
| School education |  |
| Diploma          |  |
| Bachelor         |  |
| Master           |  |
| Ph.D.            |  |

3—Did you start business? (Choose one option from each category)

| Choose one           |  | Choose one                |  | Choose one               |  |
|----------------------|--|---------------------------|--|--------------------------|--|
| Without partner      |  | As service business       |  | Without loan             |  |
| With local partner   |  | As trading business       |  | Funds from government    |  |
| With foreign partner |  | As manufacturing business |  | Loan from private source |  |

4—The business you started...

|   |                                                 |  |         |
|---|-------------------------------------------------|--|---------|
| 1 | Was my own idea and I initiated                 |  | Remarks |
| 2 | I conceived but someone else invited to join me |  |         |
| 3 | Someone else conceived and invited me to join   |  |         |
| 4 | I carried a running business of my family       |  |         |

5—Present condition of your business...

|   | Condition                            | <input checked="" type="checkbox"/> | Remarks |
|---|--------------------------------------|-------------------------------------|---------|
| 1 | Shut down/discontinued               |                                     |         |
| 2 | Scaled down                          |                                     |         |
| 3 | Continued with changes in operations |                                     |         |
| 4 | Continued with changes in ownership  |                                     |         |
| 5 | Continued without any change         |                                     |         |
| 6 | Scaled up                            |                                     |         |

6—If your answer is 1 in question no. 4, do you intend to start a new business in future?

|     |  |
|-----|--|
| Yes |  |
| No  |  |

7—Do you have formal business education?

|     |  |
|-----|--|
| Yes |  |
| No  |  |

What do you feel about the following factors potentially responsible for business failure? Give your choice according to the following guide. (1 = Strongly disagree, 2 = Disagree, 3 = Don't know, 4 = Agree, 5 = Strongly Agree)

|                                                                             | 1 | 2 | 3 | 4 | 5 |
|-----------------------------------------------------------------------------|---|---|---|---|---|
| <b>Managerial and planning</b>                                              |   |   |   |   |   |
| 8 Inadequate knowledge of pricing strategies                                |   |   |   |   |   |
| 9 Ineffective advertising/promotional strategy                              |   |   |   |   |   |
| 10 Failure to generate a long-term business plan                            |   |   |   |   |   |
| 11 Failure to generate a personnel plan                                     |   |   |   |   |   |
| 12 Ineffective interior store layout pattern                                |   |   |   |   |   |
| 13 Lack of managerial experience, skills, and training                      |   |   |   |   |   |
| 14 Inflexible decision making                                               |   |   |   |   |   |
| 15 Failure to generate a merchandise assortment plan                        |   |   |   |   |   |
| 16 Lack of experience in product line                                       |   |   |   |   |   |
| 17 Poor use of outside advisors                                             |   |   |   |   |   |
| 18 Lack of knowledge of current business literature                         |   |   |   |   |   |
| <b>Working capital management</b>                                           |   |   |   |   |   |
| 19 Poor relations with vendors                                              |   |   |   |   |   |
| 20 Difficulties in receiving merchandise                                    |   |   |   |   |   |
| 21 Inadequate financial accounting record keeping                           |   |   |   |   |   |
| <b>Competitive environment</b>                                              |   |   |   |   |   |
| 22 Competition from discount stores                                         |   |   |   |   |   |
| 23 Inability to compete in trading area                                     |   |   |   |   |   |
| 24 Failure to offer saleable merchandise assortments                        |   |   |   |   |   |
| <b>Premature growth and overexpansion</b>                                   |   |   |   |   |   |
| 25 Premature business growth/overextension                                  |   |   |   |   |   |
| 26 Inventory difficulties                                                   |   |   |   |   |   |
| <b>The fear of shame and embarrassment</b>                                  |   |   |   |   |   |
| 37 When I am failing, I lose respect for myself.                            |   |   |   |   |   |
| 38 When I am failing, I doubt that I am as good as I thought I was.         |   |   |   |   |   |
| 39 When I am not succeeding, it bothers me that I was too confident.        |   |   |   |   |   |
| 40 When I am not succeeding, I am less valuable than when I succeed.        |   |   |   |   |   |
| 41 When I am not succeeding, I still feel good about myself. (Reverse       |   |   |   |   |   |
| 42 When I am not succeeding, I get down on myself easily.                   |   |   |   |   |   |
| 43 When I am failing, it is embarrassing if others are there to see it.     |   |   |   |   |   |
| 44 When I am failing, I believe that everybody knows I am failing.          |   |   |   |   |   |
| 45 When I am failing, I believe that my doubters feel that they were right. |   |   |   |   |   |
| 46 When I am failing, I worry about what others think about me.             |   |   |   |   |   |
| 47 When I am failing, I worry that others may think I am not trying.        |   |   |   |   |   |
| <b>The fear of devaluing one's self-estimate</b>                            |   |   |   |   |   |
| 48 When I am failing, it is often because I am not smart enough.            |   |   |   |   |   |
| 49 When I am failing, I blame my lack of talent.                            |   |   |   |   |   |
| 50 When I am failing, I am afraid that I might not have enough talent.      |   |   |   |   |   |
| 51 When I am failing, it is rarely because I am not good enough.            |   |   |   |   |   |
| 52 When I am failing, I wish I could control more of my performance.        |   |   |   |   |   |

|                                        |                                                                                                                    |
|----------------------------------------|--------------------------------------------------------------------------------------------------------------------|
| 53                                     | When I am failing, I hate the fact that I am not in control of the outcome.                                        |
| 54                                     | When I am not succeeding, it is because too many factors are out of my control.                                    |
| 55                                     | When I am not succeeding, I still feel completely in control of myself.                                            |
| The fear of having an uncertain future |                                                                                                                    |
| 56                                     | When I am failing, my future seems uncertain.                                                                      |
| 57                                     | When I am failing, I believe that my future plans will change.                                                     |
| 58                                     | When I am failing, it upsets my "plan" for the future.                                                             |
| 59                                     | When I am failing, I have a plan for recovering. (Reverse-scored)                                                  |
| 60                                     | When I am failing, I am not worried about it affecting my future.                                                  |
| The fear of losing social influence    |                                                                                                                    |
| 61                                     | When I am failing, I am afraid that I won't be allowed to try again.                                               |
| 62                                     | When I am failing, I am hopeful because I know that I can still accomplish what I want to accomplish in this area. |
| 63                                     | When I am failing, I feel like I am losing a great opportunity to perform successfully.                            |
| 64                                     | When I am not succeeding, people are less interested in me.                                                        |
| 65                                     | When I am not succeeding, people seem to want to help me less.                                                     |
| 66                                     | When I am not succeeding, people tend to leave me alone.                                                           |
| 67                                     | When I am not succeeding, I can tell that some people avoid me.                                                    |
| 68                                     | When I am not succeeding, some people are not interested in me                                                     |
| 69                                     | When I am not succeeding, my value decreases for some people.                                                      |
| The fear of upsetting important others |                                                                                                                    |
| 70                                     | When I am failing, it upsets important others.                                                                     |
| 71                                     | When I am failing, I expect to be criticized by important others.                                                  |
| 72                                     | When I am failing, I lose the trust of people who are important                                                    |
| 73                                     | When I am failing, I let down people who depend on me.                                                             |
| 74                                     | When I am failing, important others still appreciate me. (Reverse                                                  |
| 75                                     | When I am failing, important others are disappointed.                                                              |
| 76                                     | When I am failing, important people think less of me.                                                              |

**What do you feel about the kind of social support you had during your venture?** Give your choice according to the following guide. (1 = Strongly disagree, 2 = Disagree, 3 = Don't know, 4 = Agree, 5 = Strongly Agree)

| Social Support | 1                                                                                          | 2 | 3 | 4 | 5 |
|----------------|--------------------------------------------------------------------------------------------|---|---|---|---|
| 27             | There is someone who can always cheer me up when I am down.                                |   |   |   |   |
| 28             | I seem to have a lot of friends.                                                           |   |   |   |   |
| 29             | I enjoy the time I spend with the people who are important to me.                          |   |   |   |   |
| 30             | When I need someone to help me out, I can usually find someone.                            |   |   |   |   |
| 31             | When something is on my mind, just talking with the people I know can make me feel better. |   |   |   |   |
| 32             | I often need help from other people but cannot get it.                                     |   |   |   |   |
| 33             | People do not come to visit me as often as I would like.                                   |   |   |   |   |
| 34             | I do not have anyone that I can confide in.                                                |   |   |   |   |
| 35             | I have no one to lean on in times of trouble.                                              |   |   |   |   |
| 36             | I often feel very lonely.                                                                  |   |   |   |   |
